# Supplementary material
Source: HighWire-hosted journal article supplement (http://www.cmaj.ca/highwire/filestream/58625/field_highwire_adjunct_files/1/enrol-manns-2-at.pdf)
Supplement: enrol-manns-2-at.pdf [file enrol-manns-2-at.pdf]

**Appendix 2 (as supplied by the authors): Description of outcomes considered and included**

| Outcome                                                                                            | Included as an outcome (Yes / No) | Reason (if not included)                                                                                    | Definition (if included)                                                                                                                                                                                                                                                                                                                       | Limitation (if included)                                                                                                                             |
|----------------------------------------------------------------------------------------------------|-----------------------------------|-------------------------------------------------------------------------------------------------------------|------------------------------------------------------------------------------------------------------------------------------------------------------------------------------------------------------------------------------------------------------------------------------------------------------------------------------------------------|------------------------------------------------------------------------------------------------------------------------------------------------------|
| Mortality                                                                                          | No                                | One year followup too short, and impact on mortality could only be expected after several years             |                                                                                                                                                                                                                                                                                                                                                |                                                                                                                                                      |
| Cardiovascular events (myocardial infarction or stroke)                                            | No                                | One year followup too short, and impact on cardiovascular events could only be expected after several years |                                                                                                                                                                                                                                                                                                                                                |                                                                                                                                                      |
| All cause hospitalization                                                                          | No                                | A large proportion of hospitalizations are insensitive to outpatient care.                                  |                                                                                                                                                                                                                                                                                                                                                |                                                                                                                                                      |
| Hospitalization or emergency room visit for diabetes-specific ambulatory care sensitive conditions | Yes (primary outcome)             |                                                                                                             | Ambulatory care sensitive conditions are conditions for which timely and effective outpatient care can help to reduce the risk of a hospital event by either preventing the onset of an illness or condition, controlling an acute episodic illness or condition or managing a chronic disease" [33](see Web Appendix 3 for list of diagnoses) | Not all hospitalization or emergency room visits for diabetes-specific ambulatory care sensitive conditions are preventable by good outpatient care. |
| Glycemic control                                                                                   | Yes                               |                                                                                                             | Last A1C during the assessment period for incident patients; mean A1C for prevalent patients (Among patients with an A1C measure)                                                                                                                                                                                                              | A1C measurements are not available for all patients, and recent clinical trials call into question the effectiveness of intensive glycemic control   |
| Use of medications recommended by clinical practice guidelines                                     | Yes                               |                                                                                                             | Filling a prescription for statins[17], metformin in patients in whom an oral hypoglycemic agent is prescribed, and ACE inhibitors or angiotensin receptor blockers in patients with proteinuria[18]                                                                                                                                           | Patients may be given the prescription but do not fill the prescription. Medication information is only available for patients 66 years and older    |
| Retinal screening                                                                                  | Yes                               |                                                                                                             | Proportion of patients who attended an ophthalmologist or optometrist.                                                                                                                                                                                                                                                                         |                                                                                                                                                      |
| Outpatient visits to internal medicine/endocrinology specialists.                                  | Yes                               |                                                                                                             | Physician claims by an internal medicine or endocrinology specialist                                                                                                                                                                                                                                                                           | Only one measure of patient access                                                                                                                   |
| Outpatient visits to primary care physicians                                                       | Yes                               |                                                                                                             | Physician claims by a primary care physician                                                                                                                                                                                                                                                                                                   | Only one measure of                                                                                                                                  |

Appendix to: Manns BJ, Tonelli M, Zhang J, et al. Enrolment in primary care networks: impact on outcomes and processes of care for patients with diabetes. *CMAJ* 2011. DOI:10.1503/cmaj110755.

Copyright © 2011 Canadian Medical Association or its licensors

|                                                                                                                                          |     |                           |                                                                                |                                                           |
|------------------------------------------------------------------------------------------------------------------------------------------|-----|---------------------------|--------------------------------------------------------------------------------|-----------------------------------------------------------|
|                                                                                                                                          |     |                           |                                                                                | patient access                                            |
| Proportion of patients who had guideline recommended laboratory testing for A1C, urine albumin to creatinine ratio and cholesterol panel | Yes |                           | Any measurement of A1C, urine albumin to creatinine ratio or cholesterol panel | Laboratory testing may be recommended but not undertaken. |
| Body weight or body mass index                                                                                                           | No  | Information not available |                                                                                |                                                           |
| Smoking                                                                                                                                  | No  | Information not available |                                                                                |                                                           |
| Patient satisfaction                                                                                                                     | No  | Information not available |                                                                                |                                                           |
